# Supplementary material for: A dual-functional halloysite nanotube-based nanoprobe for the detection and removal of hypochlorite
Source: Royal Society of Chemistry journal article supplement (doi:10.1039/d3nj03949h), 2023-01-01
Supplement: d3nj03949h1.pdf [file d3nj03949h1.pdf]

**A dual-functional halloysite nanotube-based fluorescent probe for  
the detection and removal of hypochlorite**

Yan Pan,<sup>a</sup> Cuiping Zhou,<sup>a</sup> Shibin Long,<sup>a</sup> Lin Li,<sup>a</sup> Xiongzhi Wu,<sup>a\*</sup> Liqiang Yan<sup>a\*</sup>

<sup>a</sup> *College of Chemistry and Bioengineering, Guilin University of Technology, Guilin, Guangxi  
541006, P.R. China*

*\*Corresponding authors, E-mail: 2004046@glut.edu.cn (Xiongzhi Wu); liqiangyan@glut.edu.cn  
(Liqiang Yan).*

Table S1. The functional comparison of HNTs-probe with some fluorescent probes

| Probes                                                                              | $\lambda_{\text{ex}}$<br>(nm) | $\lambda_{\text{em}}$<br>(nm) | Solvent                                                              | LOD<br>(nM) | Interference     | Separation | Ref.       |
|-------------------------------------------------------------------------------------|-------------------------------|-------------------------------|----------------------------------------------------------------------|-------------|------------------|------------|------------|
| 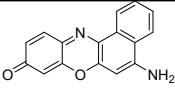   | 580                           | 626                           | DMSO/H <sub>2</sub> O<br>(1/99,v/v)                                  | 72          | no               | no         | [20]       |
|    | 400                           | 470                           | DMSO/ H <sub>2</sub> O,<br>(1/9,v/v)                                 | 390         | no               | no         | [21]       |
|    | 470                           | 525                           | DMSO/H <sub>2</sub> O<br>(1/99,v/v)                                  | 9.6         | no               | no         | [22]       |
|    | 370                           | 450                           | C <sub>2</sub> H <sub>5</sub> OH<br>/H <sub>2</sub> O,<br>(1:1, v/v) | 6.7         | no               | no         | [23]       |
|   | 440                           | 500                           | DMSO/H <sub>2</sub> O<br>(1/9,v/v)                                   | 1.4         | Cu <sup>2+</sup> | no         | [24]       |
|  | 401                           | 460                           | CH <sub>3</sub> CN /H <sub>2</sub> O<br>(4/1,v/v)                    | 5.7         | no               | no         | [25]       |
|  | 460                           | 590                           | CH <sub>3</sub> CN /H <sub>2</sub> O<br>(1/99,v/v)                   | 0.14        | no               | no         | [26]       |
|  | 400                           | 550                           | DMSO /H <sub>2</sub> O<br>(4/1,v/v)                                  | 1.36        | no               | no         | [27]       |
|  | 365                           | 473                           | DMSO/H <sub>2</sub> O<br>(4/1,v/v)                                   | 56          | no               | no         | This study |
| HNTs-probe                                                                          | 366                           | 460                           | H <sub>2</sub> O                                                     | 8.4         | no               | yes        | This study |

---

## S1. Materials and instruments

Halloysite nanotubes (CAS: 1332-58-7) was purchased from HuNan shanlinshiyu Co., Ltd (China). 8-Formyl-7-hydroxy-4-methylcoumarin was synthesized according to previous work. Other reagents (analytically pure) were purchased from market suppliers and used directly without further treatment.

The main instruments include a field emission scanning electron microscope (regulus8100, Hitachi Scientific Instruments Co., LTD, Japan), a thermal gravimetric analyzer (NETZSCH TG209F3, Germany), a Cary Eclipse fluorescence spectrophotometer (Varian, USA), a UV-vis (PerkinElmer Lambda 750 photometer), an NMR spectrum (Bruker Avance III Ascend TM NMR spectrometer, 500 MHz), and a fourier infrared spectrum analyzer (Nicolet iS10).

## S2. Synthesis

### *S2.1 of HNTs-NH<sub>2</sub>*

The mixture of (3-aminopropyl)triethoxysilane (20 mL), HNTs (3.0 g) and anhydrous Na<sub>2</sub>CO<sub>3</sub> (0.10 g) was stirred at 80 °C for 48 h. After centrifugal separation, the residue was washed with water, C<sub>2</sub>H<sub>5</sub>OH, and THT in turn. A white solid HNTs-NH<sub>2</sub> (1.62 g) was obtained after freeze-drying.

### *S2.2 Synthesis of HNTs-COCl*

HNTs-NH<sub>2</sub> (0.3 g) and triethylamine (0.5 mL, 3.6 mmol) were dispersed in DMSO (6 mL). When oxalyl chloride (0.16 mL, 1.89 mmol) was slowly added drop by drop in an ice bath, the mixture was stirred at room temperature for 16 h. After centrifugation at 8000 rpm for 3 min, the sediment was further washed with ethyl acetate and CH<sub>2</sub>Cl<sub>2</sub>, successively. A light yellow product HNTs-COCl (0.14 g) was obtained after freeze-drying.

### *S2.3 Synthesis of HNTs-CHO*

Formyl-7-hydroxy-4-methylcoumarin (0.11 g, 0.54 mmol) was dissolved in DMSO (3 mL). After the addition of HNTs-COCl (0.29 g) and triethylamine (1 mL, 7.2 mmol), the mixture was stirred at room temperature for 2 h and at 45 °C for 12 h. When the mixture was cooled, the precipitate was centrifuged at 8000 rpm for 3 min,

washed with ethyl acetate, CH<sub>3</sub>OH, and CH<sub>2</sub>Cl<sub>2</sub> in turn. After freeze-drying, a yellow product HNTs-CHO (0.32 g) was obtained.

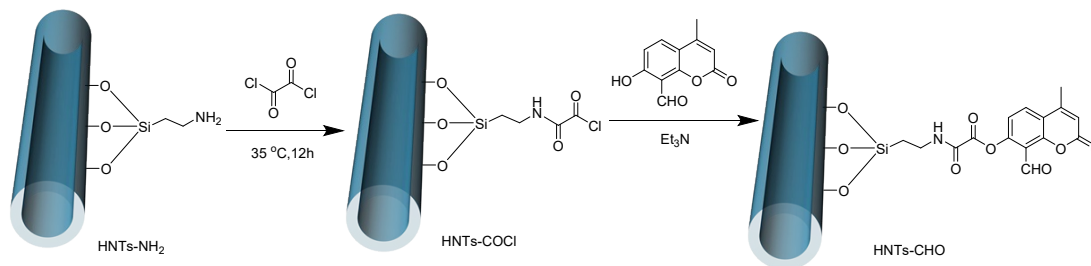

Scheme S1. Synthetic route of HNTs-CHO.

#### S2.4 Synthesis of coumarin-based fluorophore

8-Formyl-7-hydroxy-4-methylcoumarin (0.21 g, 1.0 mmol) and methyl hydrazinecarboxylate (0.10 g, 1.1 mmol) were dissolved in EtOH (15 mL). The mixture was stirred and refluxed for 6 h. After suction filtration, a light yellow powder was obtained, yield 69.3%. <sup>1</sup>H NMR (500 MHz, DMSO-*d*<sub>6</sub>)  $\delta$ : 12.38 (s, 1H), 11.70 (s, 1H), 8.71 (s, 1H), 7.71 – 7.69 (d, *J* = 10 Hz, 1H), 6.95 – 6.94 (d, *J* = 5 Hz, 1H), 6.25 (s, 1H), 3.75 (s, 3H), 2.41 (s, 3H). HR-MS for C<sub>13</sub>H<sub>12</sub>N<sub>2</sub>O<sub>5</sub> found 276.0756, calculated 276.07.

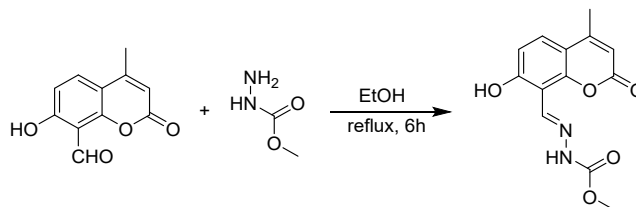

Scheme S2. Synthetic route of coumarin-based fluorophore.

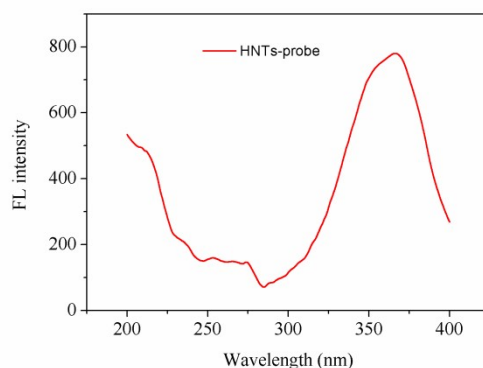

Fig. S1. The excitation wavelength ( $\lambda_{\text{ex}}$ ) of HNTs-probe when the emission wavelength was set as 460 nm in water.

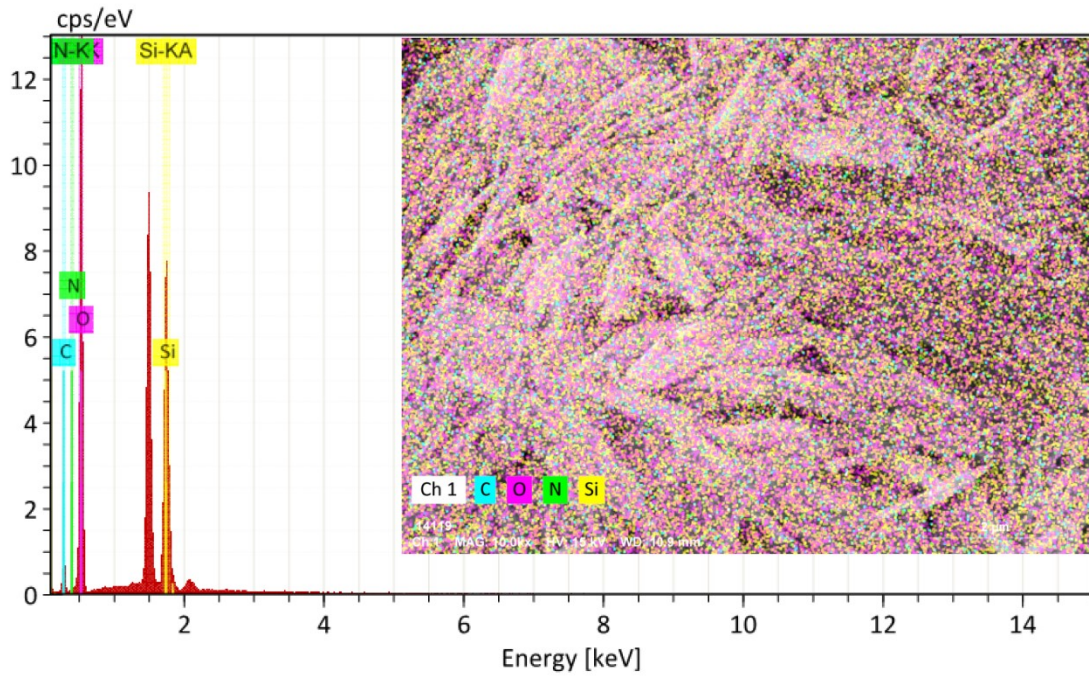

Fig. S2. EDS mapping of HNTs. C: blue color, N: green color, O: pink color.

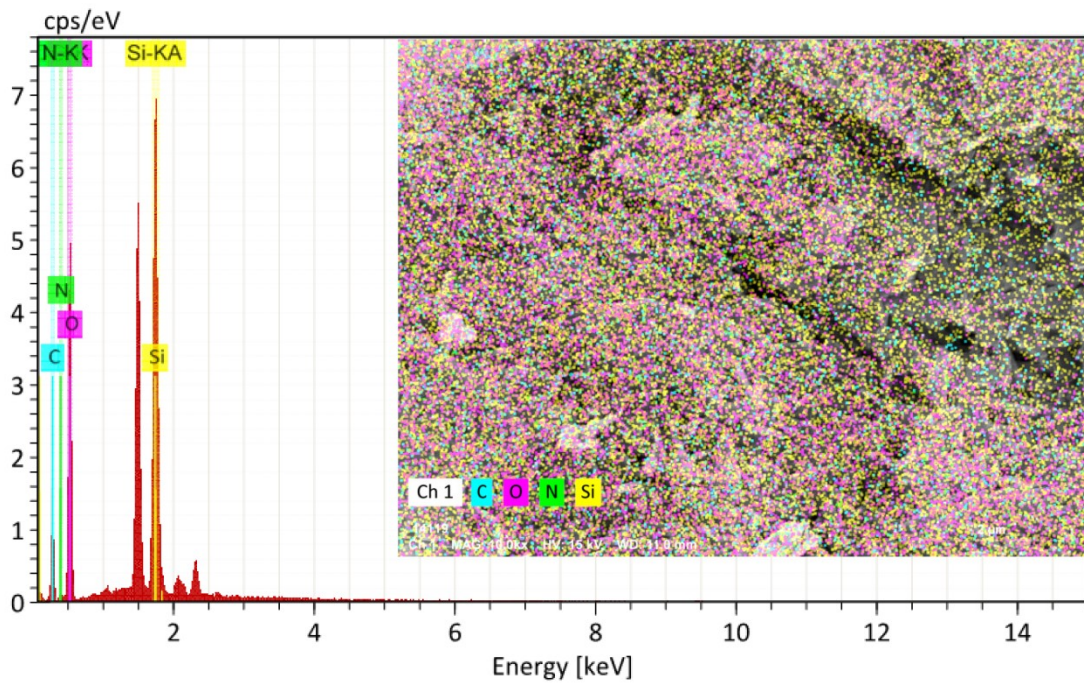

Fig. S3. EDS mapping of HNTs-probe. C: blue color, N: green color, O: pink color.

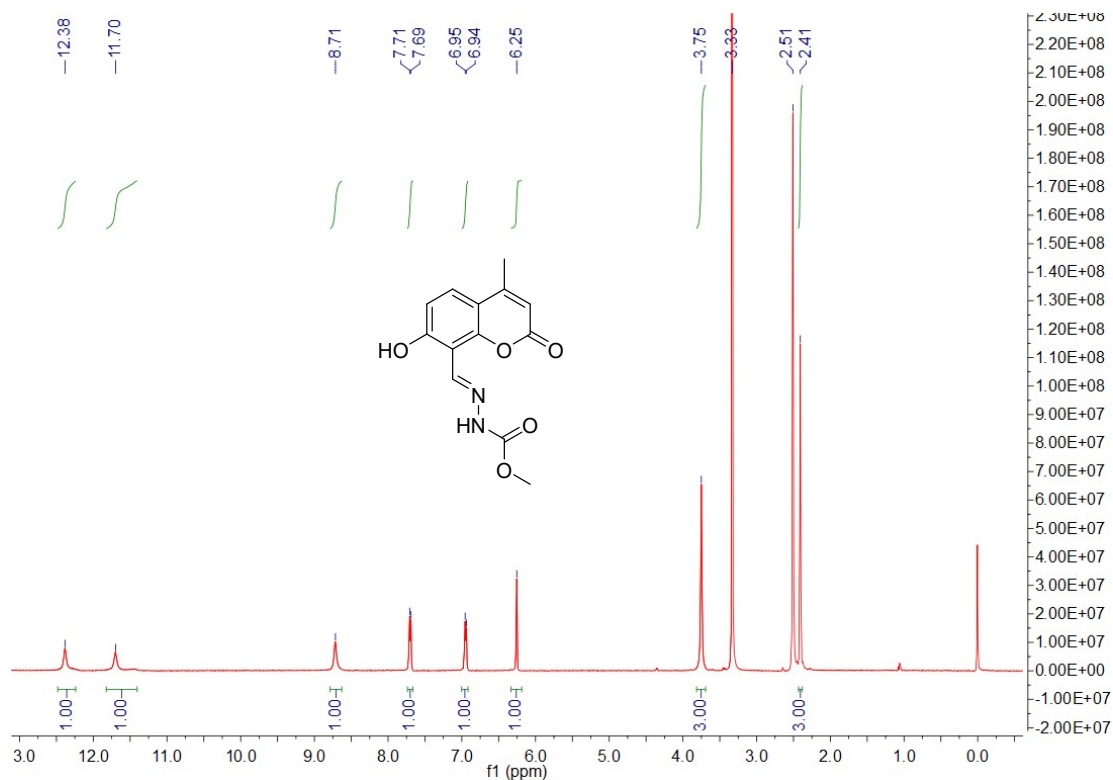

Fig. S4.  $^1\text{H}$  NMR of coumarin-based fluorophore in  $\text{DMSO-}d_6$ .

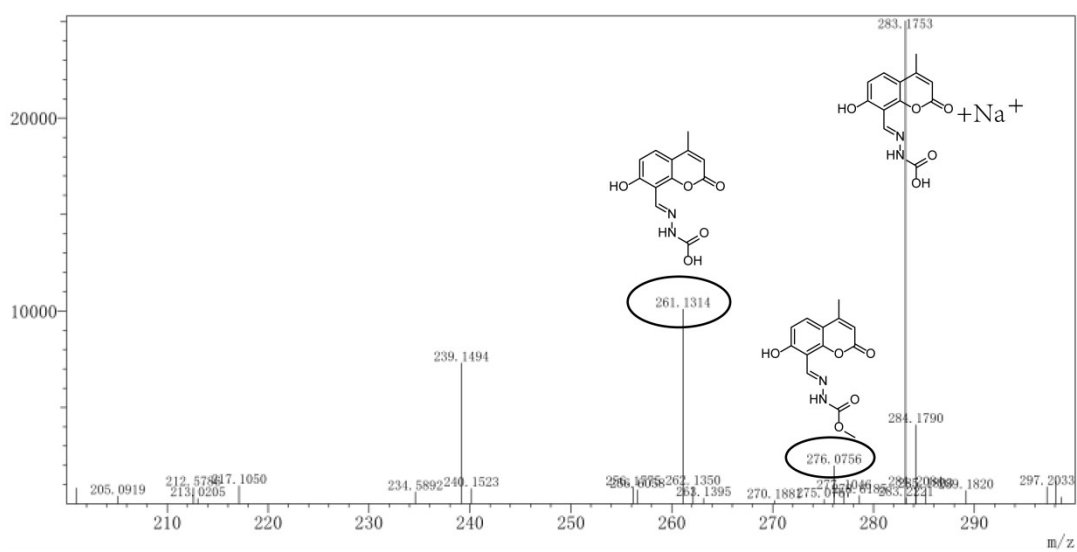

Fig. S5. HR-MS of coumarin-based fluorophore in  $\text{CH}_3\text{CN}$ .

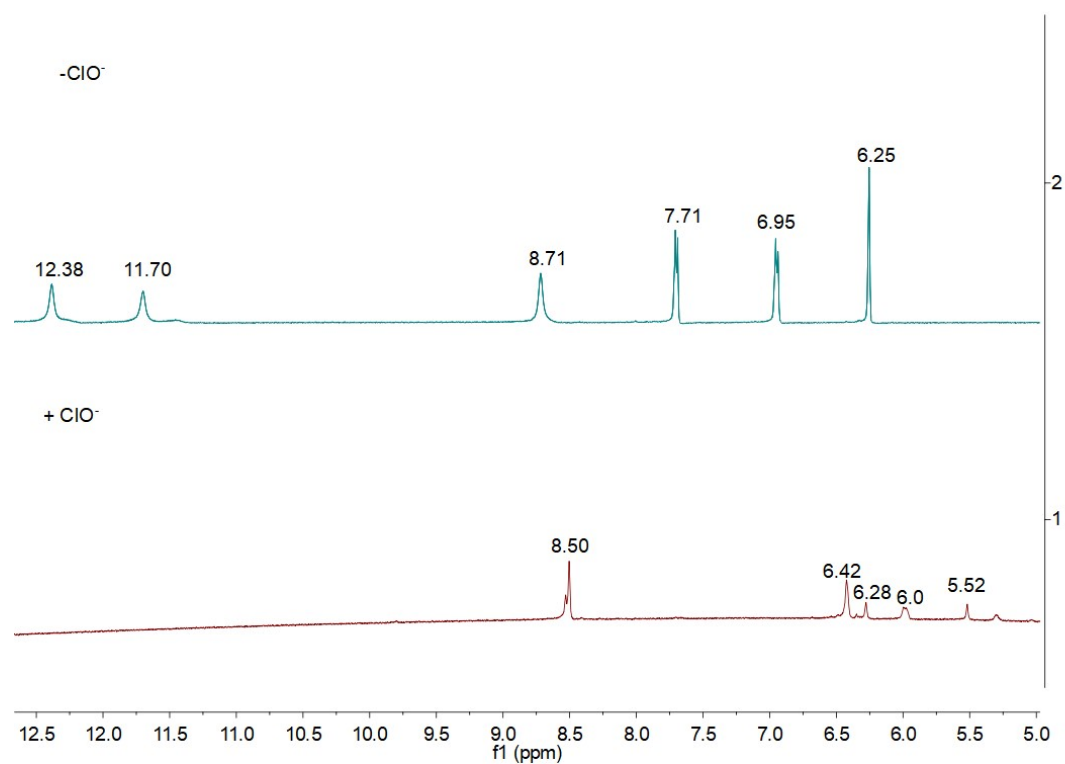

Fig. S6. <sup>1</sup>H NMR of coumarin-based fluorophore before and after adding ClO<sup>-</sup> in DMSO-*d*<sub>6</sub>.

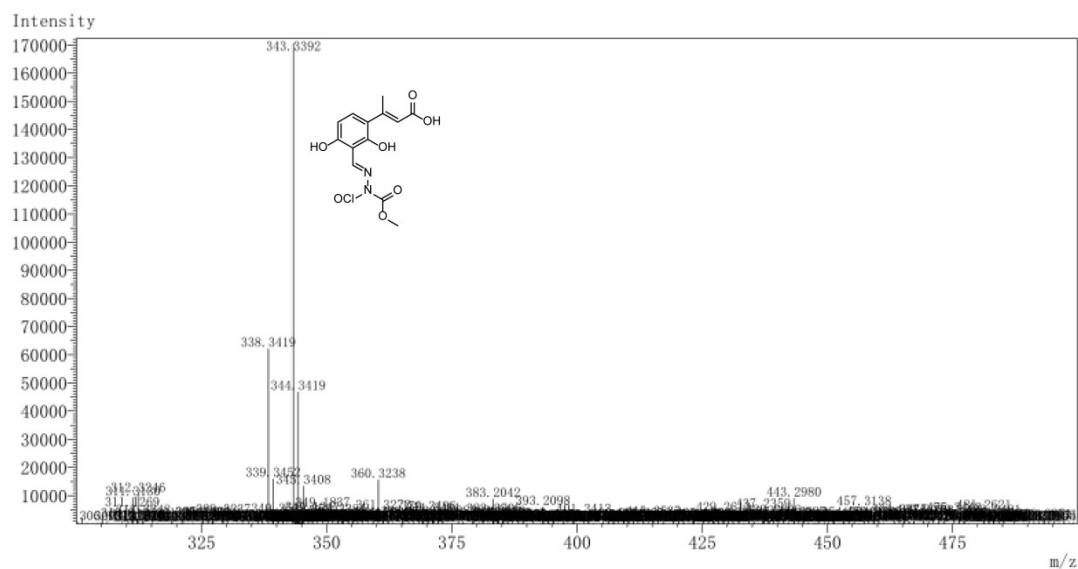

Fig. S7. HR-MS of coumarin-based fluorophore reacted with ClO<sup>-</sup> in CH<sub>3</sub>CN (Negative ion modes).

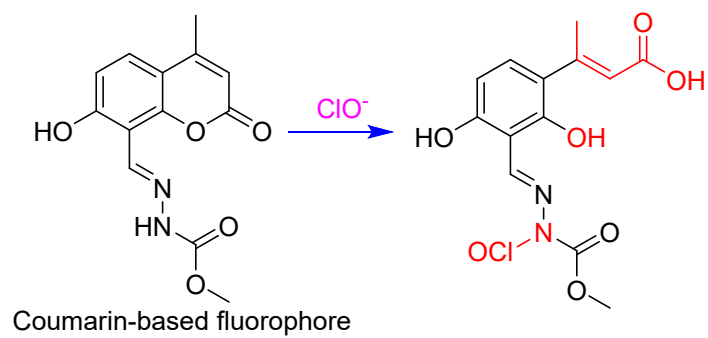

Scheme S3. Reaction mechanism between coumarin-based fluorophore with  $\text{ClO}^-$ .
